# Supplementary material for: An insight into pre-Columbian raised fields: The case of San Borja, Bolivian lowlands
Source: Copernicus journal article supplement (doi:10.5194/soil-2016-27), 2016-04-11
Supplement: Supplementary file [file soil-2016-27-RC2-supplement.pdf]

## Corrections of the article

### TEXT

- 1/ Change the word « palaeo » to « paléo » which is more correct, in all the text.
- 2/ p4 first line, I don't understand the meaning of « with crevasse occurring every few years » if you are speaking of the river ! I guess that you are speaking of soils, so you should change the writing of your sentence. In other end, instead of « crevasse », you should use « crack » which is more usual for this soil feature description.
- 3/ Change the medical word « avulsion » by a technical one as « lifting » for instance.
- 4/ p5 line 15 : Add a space between Na<sup>+</sup>, and Mn<sup>2+</sup>.
- 5/ p7 line 14 : change « ; » by « : » after « each year ».
- 6/ Change the capital of Goethite and Lepidocrite with a lowercase letter.
- 7/ p7 line 23 : change « ; » by « : » after « major layers ».
- 8/p8 line5, join « Fig » and the number « 4 » in the same line.
- 9/p8 line17, join « 30-50 » with « cm » in the same line.
- 10/p8 line20, put « meanwhile » before « the content ».
- 11/p8 line29, join « 20 » with « cm » in the same line.
- 12/ p9 line 15, Change the capital Quartz with a lowercase letter.
- 13/p10 line 5, Take off « base saturation ».
- 14/p10 line 12, Put a point at the end of the sentence.
- 15/p10 line 25, Put a space before 270 cm.
- 16/p11 line 15 same comments than above in point 2 and 3 .
- 17/p13 line 13 same comments than above in point 2.
- 18/p13 line 19 change « This seems to be common » by « This is common » , because it is just common !
- 19/p15 line 7, Replace the « . » after « aluminium » by a space.

### REFERENCES

- P18, line 8, Replace « Dephine » by « Delphine »
- P20, line 3, Replace « hidrauclicas » by « hidraulicas »
- P20, line 21, Replace « Nino » by « Niño »
- P20, line 44, Replace « Nino » by « Niño »
- P21, line 5, Replace « Acuático » by « acuático »
- P21, line 18, Replace « off Peru » by « of Peru »

## TABLES

Replace the #DIV/0 ! which are appearing in some lines of the Ca/Al column by « -«

## FIGURES

Fig 1. Legend should explain the green color (= raised fields)

Fig 3. The settlements (close to the pound) presents in Fig 1 is missing here !

Fig 4 : I do not understand the second image of Ridge2 « yellow oxidized ... »

Fig 8 : You must use the same depth scale for all the profile as well as the same X scale.

The meaning of the dot line is not clear at all. They do not correspond to the soil description, for instance ! The boundary of infilling is +/- 60 cm according to the profile description and here it is at 35 cm deep !

Fig. 9 : Use the same scale for the depth of soil profile
